# Supplementary material
Source: publisher figshare collection journal article supplement (https://plos.figshare.com/articles/dataset/_/1606800)
Supplement: Supplementary file 1 [file 1]

Archive with 6 entries (6 files):
- S1_Fig.pdf
- S2_Fig.pdf
- S3_Fig.pdf
- S4_Fig.pdf
- S5_Fig.pdf
- S1_File.docx
